# Supplementary material for: Development and Evaluation of a Leukemia Diagnosis System Using Deep Learning in Real Clinical Scenarios
Source: Frontiers journal article supplement (doi:10.3389/fped.2021.693676), 2021-06-24
Supplement: Image_1.pdf [file Image_1.pdf]

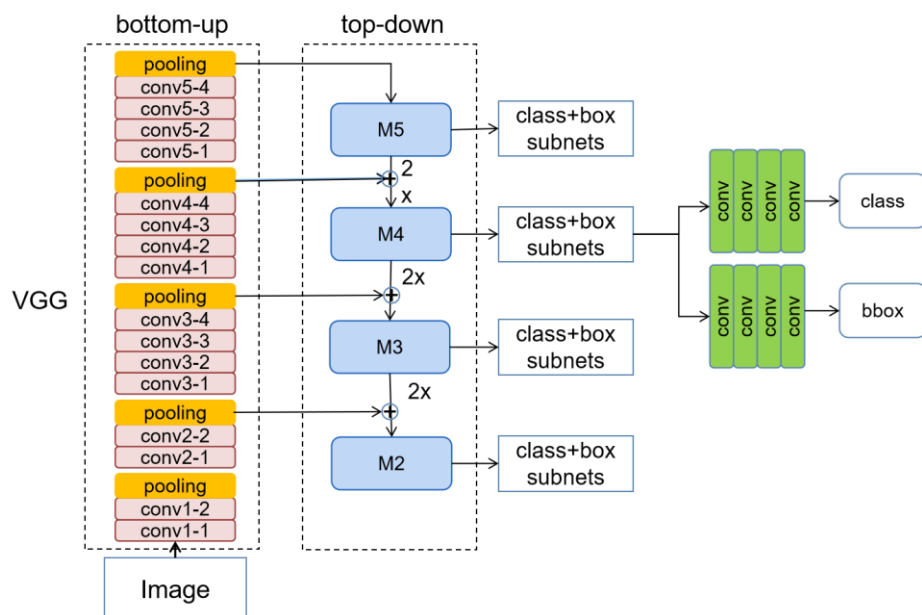

Figure S1. The framework of RetinaNet

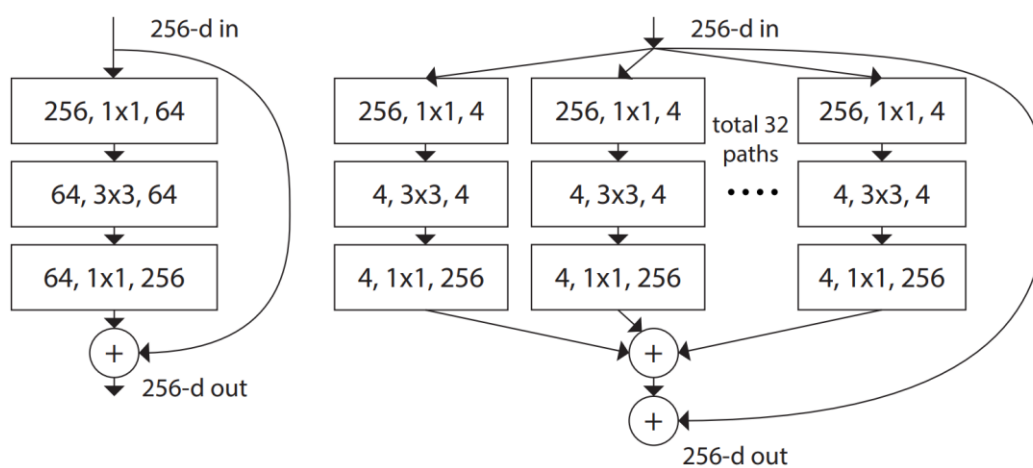

Figure S2. Left: ResNet block. Right: ResNeXt block

| stage | output  | ResNet-50                                                                                    | <b>ResNeXt-50 (32×4d)</b>                                                                            |
|-------|---------|----------------------------------------------------------------------------------------------|------------------------------------------------------------------------------------------------------|
| conv1 | 112×112 | 7×7, 64, stride 2                                                                            | 7×7, 64, stride 2                                                                                    |
| conv2 | 56×56   | 3×3 max pool, stride 2                                                                       | 3×3 max pool, stride 2                                                                               |
|       |         | $\begin{bmatrix} 1\times 1, 64 \\ 3\times 3, 64 \\ 1\times 1, 256 \end{bmatrix} \times 3$    | $\begin{bmatrix} 1\times 1, 128 \\ 3\times 3, 128, C=32 \\ 1\times 1, 256 \end{bmatrix} \times 3$    |
| conv3 | 28×28   | $\begin{bmatrix} 1\times 1, 128 \\ 3\times 3, 128 \\ 1\times 1, 512 \end{bmatrix} \times 4$  | $\begin{bmatrix} 1\times 1, 256 \\ 3\times 3, 256, C=32 \\ 1\times 1, 512 \end{bmatrix} \times 4$    |
| conv4 | 14×14   | $\begin{bmatrix} 1\times 1, 256 \\ 3\times 3, 256 \\ 1\times 1, 1024 \end{bmatrix} \times 6$ | $\begin{bmatrix} 1\times 1, 512 \\ 3\times 3, 512, C=32 \\ 1\times 1, 1024 \end{bmatrix} \times 6$   |
| conv5 | 7×7     | $\begin{bmatrix} 1\times 1, 512 \\ 3\times 3, 512 \\ 1\times 1, 2048 \end{bmatrix} \times 3$ | $\begin{bmatrix} 1\times 1, 1024 \\ 3\times 3, 1024, C=32 \\ 1\times 1, 2048 \end{bmatrix} \times 3$ |
|       | 1×1     | global average pool<br>1000-d fc, softmax                                                    | global average pool<br>1000-d fc, softmax                                                            |

Figure S3. ResNet 50 and ResNeXt50(32x4d)
